# Supplementary material for: Crystal structure and MD simulation of mouse EndoV reveal wedge motif plasticity in this inosine-specific endonuclease
Source: PubMed Central journal article supplement (PMC4842958; doi:10.1038/srep24979), 2016-04-25
Supplement: srep24979-s1.pdf [file srep24979-s1.pdf]

## Crystal structure and MD simulation of mouse EndoV reveal wedge motif plasticity in this inosine-specific endonuclease

Meh Sameen Nawaz, Erik Sebastian Vik, Mia Elise Ronander, Anne Marthe Solvoll, Pernille Blicher, Magnar Bjørås, Ingrun Alseth, Bjørn Dalhus

### Supplementary Information

#### Supplementary Figure S1

Influence of pH and cofactor concentrations on EndoV activity. Mouse (grey curves) and human (black curves) endonuclease V were incubated at pH 7.5 (square) or pH 8.5 (circle) with increasing amounts of MnCl<sub>2</sub> (left panels) or MgCl<sub>2</sub> (0.5-2.5-5 mM) (right panels) and with substrates **(a)**, **(b)**; single stranded IIUI, **(c)**, **(d)**; double stranded IIUI, **(e)**, **(f)**; single stranded I, **(g)**,**(h)**; double stranded I. In **a-d** 15 nM enzymes were used, and in **e-h** 25 nM. Assays were performed as described for Figure 1b. EndoV activity without Mn/Mg ions was set to 0% in all assays. Cleavage (%) was quantified using ImageQuant TL.

#### Supplementary Figure S2

Influence of Na<sup>+</sup> and K<sup>+</sup> concentrations on Endonuclease V activity. Mouse (grey curves) and human (black curves) endonuclease V were incubated with increasing amounts of KCl (square) or NaCl (circle) (50-100-150 mM) at pH 7.5, 0.5 mM MnCl<sub>2</sub> (left panels) or at pH 8.5, 2.5 mM MgCl<sub>2</sub> (right panels) and with substrates **(a)**, **(b)**; single stranded IIUI, **(c)**, **(d)**; double stranded IIUI. 15 nM enzymes were used and assays performed as described for Figure 1b. ImageQuant TL was used for quantification.

#### Supplementary Figure S3

Tyr91 side chain conformation in MD simulations of mouse and human EndoV. **(a)** In mouse EndoV, the Tyr91  $\chi^1$  side chain fluctuates between conformation  $\sim -60^\circ$  and  $\sim +60^\circ$ , with time ratio  $\sim 3:1$ . **(b)** In human EndoV, the Tyr91  $\chi^1$  side chain fluctuates between conformation  $\sim +/-180^\circ$  and  $\sim -60^\circ$ , with time ratio  $\sim 1:1$ .

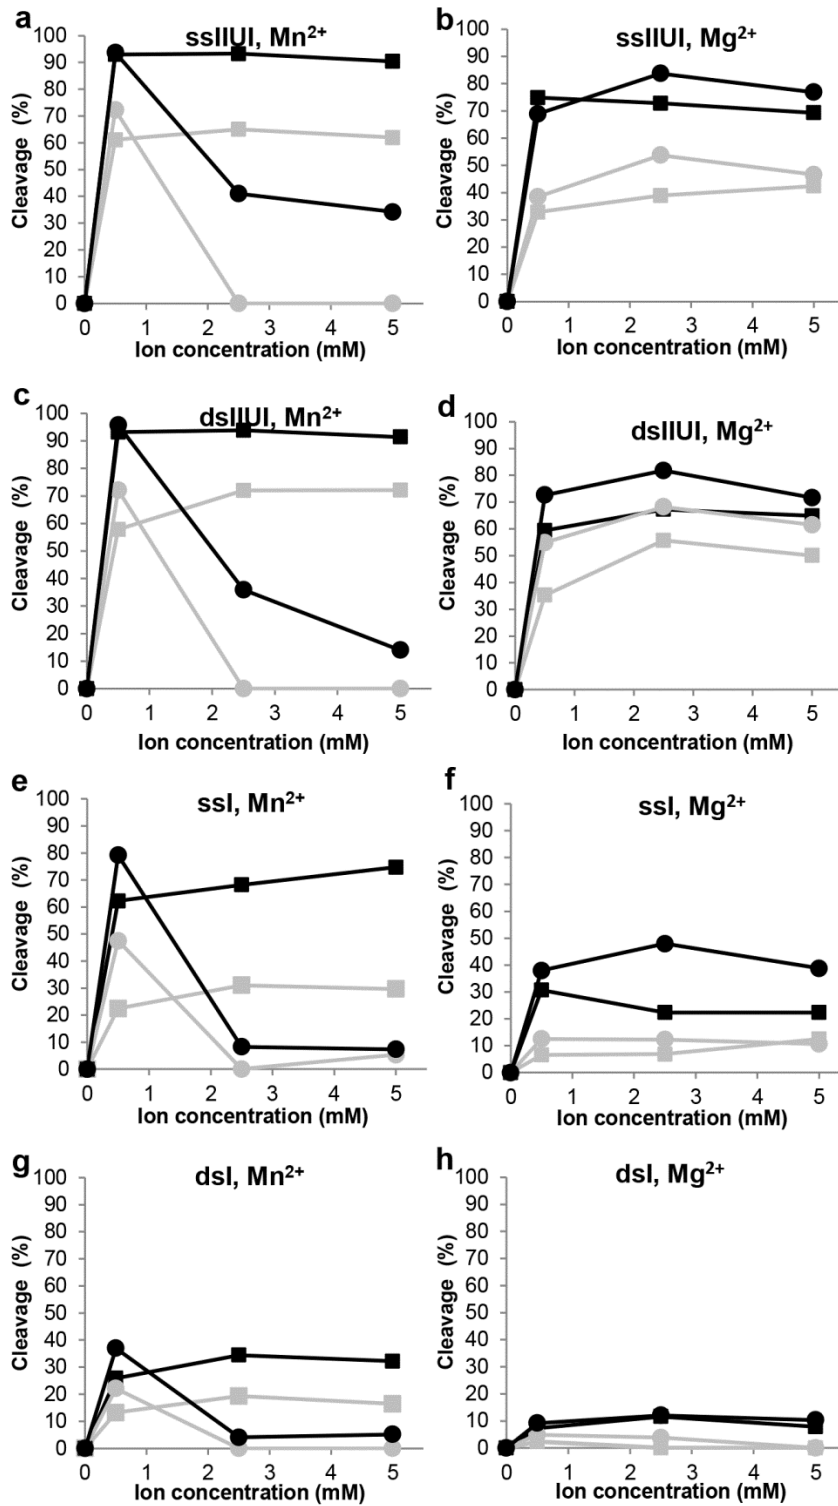

Supplementary Figure S1

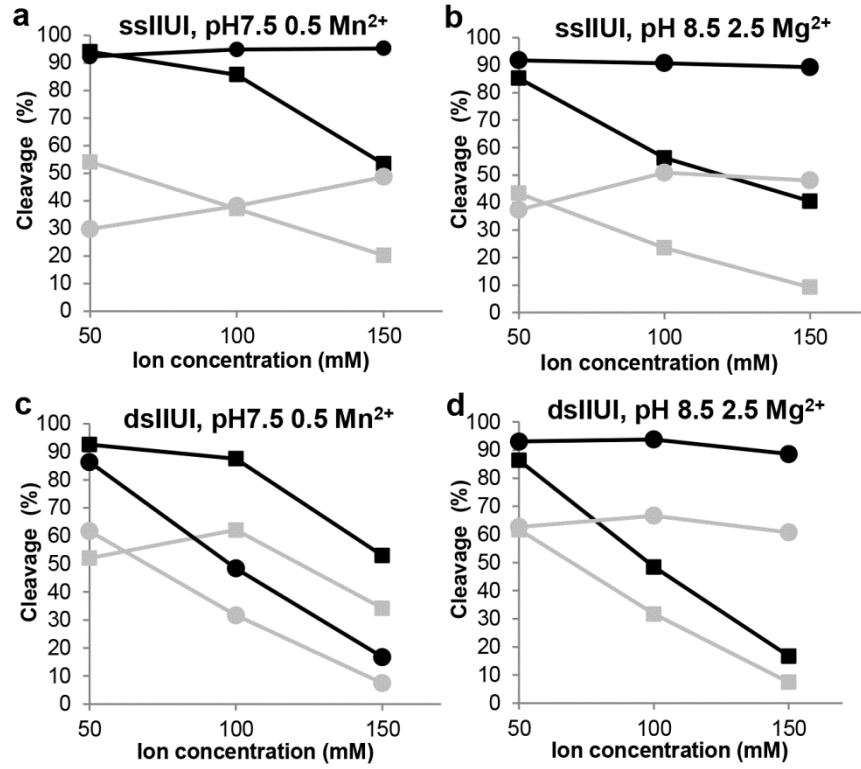

Supplementary Figure S2

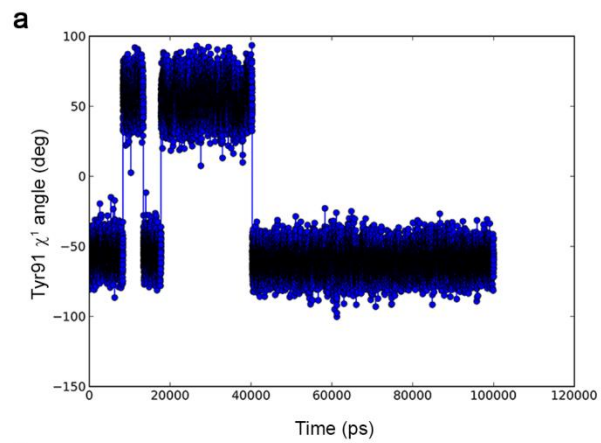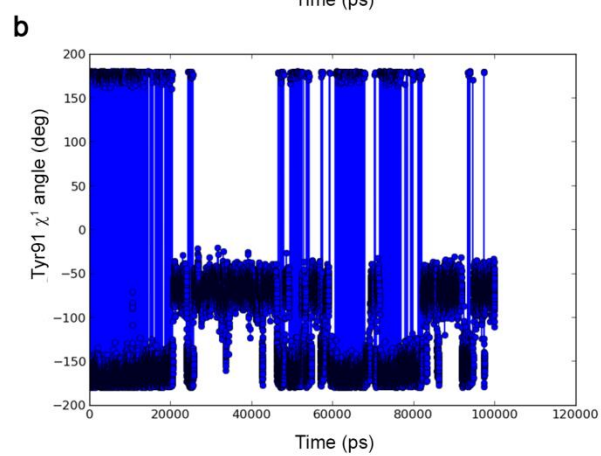

**Supplementary Figure S3**
